# Supplementary material for: Genotoxicity Response of Fibroblast Cells and Human Epithelial Adenocarcinoma In Vitro Model Exposed to Bare and Ozone-Treated Silica Microparticles
Source: MDPI journal article supplement (doi:10.3390/cells11020226), 2022-01-11
Supplement: s1 [file s1]

Table S1. DATA COMET.

[illegible]

Table S2: DATA MNs.

| HS27 ctrl |             |              |      | HS27 Silica |             |              |   | HS27 Silica + O <sub>2</sub> |   |             |              | HS27 ctrl |     |             |              |      |    |      |    |
|-----------|-------------|--------------|------|-------------|-------------|--------------|---|------------------------------|---|-------------|--------------|-----------|-----|-------------|--------------|------|----|------|----|
| 48h       |             | 72h          |      | 48h         |             | 72h          |   | 48h                          |   | 72h         |              | 48h       |     | 72h         |              |      |    |      |    |
|           | biocultured | microculture |      |             | biocultured | microculture |   |                              |   | biocultured | microculture |           |     | biocultured | microculture |      |    |      |    |
| glass 1   | 905         | 6            | 1775 | 6           | glass 1     | 419          | 4 | 228                          | 3 | glass 1     | 527          | 6         | 554 | 5           | glass 1      | 872  | 12 | 1475 | 24 |
| glass 2   | 823         | 4            | 1183 | 4           | glass 2     | 528          | 6 | 504                          | 5 | glass 2     | 621          | 7         | 765 | 4           | glass 2      | 963  | 15 | 1283 | 21 |
| glass 3   | 1022        | 7            | 983  | 5           | glass 3     | 812          | 7 | 693                          | 6 | glass 3     | 437          | 4         | 542 | 3           | glass 3      | 1128 | 18 | 1421 | 19 |
| glass 4   | 1314        | 9            | 1367 | 7           | glass 4     | 812          | 9 | 761                          | 7 | glass 4     | 769          | 9         | 679 | 5           | glass 4      | 1423 | 21 | 1329 | 19 |
| glass 5   | 832         | 4            | 891  | 3           | glass 5     | 762          | 8 | 734                          | 7 | glass 5     | 678          | 6         | 701 | 4           | glass 5      | 750  | 11 | 1091 | 17 |
| glass 6   | 1131        | 7            | 1286 | 4           | glass 6     | 692          | 7 | 811                          | 8 | glass 6     | 595          | 6         | 789 | 5           | glass 6      | 1192 | 16 | 1127 | 18 |

  

| HS27 ctrl                           |           | HS27 Silica                         |         | HS27 Silica + O <sub>2</sub>        |           | HS27 ctrl                           |              |           |
|-------------------------------------|-----------|-------------------------------------|---------|-------------------------------------|-----------|-------------------------------------|--------------|-----------|
| microculture/1000 biocultured cells |           | microculture/1000 biocultured cells |         | microculture/1000 biocultured cells |           | microculture/1000 biocultured cells |              |           |
| 48h                                 | 72h       | 48h                                 | 72h     | 48h                                 | 72h       | 48h                                 | 72h          |           |
| glass 1                             | 6.0301508 | 3.3828917                           | glass 1 | 9.5465304                           | 8.7719208 | glass 1                             | 13.781468    | 16.271186 |
| glass 2                             | 4.8020573 | 3.3812340                           | glass 2 | 11.363636                           | 9.6206349 | glass 2                             | 11.2721471   | 5.2287682 |
| glass 3                             | 6.8492151 | 5.08847                             | glass 3 | 11.437308                           | 8.6582087 | glass 3                             | 9.15331878   | 5.5302554 |
| glass 4                             | 6.8492151 | 5.1207023                           | glass 4 | 11.083744                           | 9.1984231 | glass 4                             | 11.71875     | 7.3637703 |
| glass 5                             | 4.2918455 | 3.3673034                           | glass 5 | 10.498688                           | 9.5367847 | glass 5                             | 8.87539645   | 5.7061341 |
| glass 6                             | 6.7896247 | 3.1950577                           | glass 6 | 10.115907                           | 9.864365  | glass 6                             | 10.03344482  | 6.5018006 |
| MEAN                                | 5.5436697 | 3.9138749                           | MEAN    | 10.674354                           | 6.3352344 | MEAN                                | 10.1247655   | 6.3301547 |
| SD                                  | 1.1164382 | 0.8338618                           | SD      | 1.7501757                           | 0.5386701 | SD                                  | 1.25394617   | 1.0001844 |
| SE                                  | 0.500054  | 0.411769                            | SE      | 0.3373004                           | 0.214462  | SE                                  | 0.5003291777 | 0.4070074 |

| HS27  |             |            |           | Chr1 HS27 vs Tr1 HS27 |           |           |             |      |       |          |       |
|-------|-------------|------------|-----------|-----------------------|-----------|-----------|-------------|------|-------|----------|-------|
|       | 4th         | 7th        |           | Chr1                  | Sitca     | Sitca+O3  | Catch       | Chr1 | Sitca | Sitca+O3 | Catch |
| CTRL  | 5.9450607   | 3.9159749  |           |                       |           |           |             |      |       |          |       |
| SL    | 10.674354   | 8.3202044  |           |                       |           |           |             |      |       |          |       |
| SL+O3 | 10.212477   | 8.3307547  |           |                       |           |           |             |      |       |          |       |
| SE    | 14.62094    | 5.190037   |           |                       |           |           |             |      |       |          |       |
| SE    | 0.006404    | 0.4131789  |           |                       |           |           |             |      |       |          |       |
| SE    | 0.3073096   | 0.2414022  |           |                       |           |           |             |      |       |          |       |
| SE    | 0.5032019   | 0.4403794  |           |                       |           |           |             |      |       |          |       |
| SE    | 0.4488263   | 0.541931   |           |                       |           |           |             |      |       |          |       |
|       |             |            |           | 4th                   | 4th       | 4th       | 7th         | 7th  | 7th   | 7th      |       |
|       | 0.63031594  | 0.5465394  | 0.1221465 | 13.781469             | 3.3802181 | 8.7715298 | 7.645259939 | 7.62 |       |          |       |
|       | 4.86527315  | 11.3636    | 11.27242  | 15.576329             | 3.3812342 | 9.9206349 | 5.22875817  | 16.1 |       |          |       |
|       | 6.949315068 | 11.437308  | 11.532181 | 15.59744601           | 5.1080743 | 8.8580087 | 5.530583351 | 16.1 |       |          |       |
|       | 6.949315068 | 11.3837444 | 11.71878  | 14.73755446           | 5.1209763 | 9.1984421 | 7.38377025  | 14.1 |       |          |       |
|       | 4.91248404  | 10.46968   | 8.8757396 | 14.3042519            | 3.3870304 | 9.9367495 | 5.700134694 | 16.1 |       |          |       |
|       | 6.799247233 | 10.11567   | 10.033445 | 13.42218179           | 3.1959577 | 8.3637943 | 5.80190585  | 15.0 |       |          |       |

|        |          |           |             |           |             |             |
|--------|----------|-----------|-------------|-----------|-------------|-------------|
| T-Test | 5.32E-06 | 5.192E-05 | 6.02240E-08 | 2.174E-07 | 0.001491383 | 5.96772E-09 |
|--------|----------|-----------|-------------|-----------|-------------|-------------|

Table S3: DATA MTS.

MTS\_HS27

| CTRL | 0 | 24h         | 48h       | 72h       |
|------|---|-------------|-----------|-----------|
|      |   | 0.401199996 | 0.5019    | 0.46095   |
|      |   | 0.402999997 | 0.6527    | 0.516666  |
|      |   | 0.401800007 | 0.50529   | 0.51899   |
|      |   | 0.366299987 | 0.456177  | 0.65219   |
|      |   | 0.401199996 | 0.555736  | 0.54995   |
|      |   | 0.402999997 | 0.62253   | 0.573722  |
|      |   | 0.401800007 | 0.4927    | 0.49131   |
|      |   | 0.366299987 | 0.650889  | 0.418566  |
|      |   | 0.3577      | 0.543778  | 0.46435   |
| mean |   | 0.389144442 | 0.5535222 | 0.5162993 |
| SD   |   | 0.019453288 | 0.0727539 | 0.0696796 |
| SE   |   | 0.006877776 | 0.0257224 | 0.0246354 |

| SILICA | 0     | 24h         | 48h       | 72h       |
|--------|-------|-------------|-----------|-----------|
|        |       | 0.401199996 | 0.518999  | 0.447295  |
|        |       | 0.402999997 | 0.494278  | 0.447777  |
|        |       | 0.401800007 | 0.447459  | 0.389624  |
|        |       | 0.366299987 | 0.451811  | 0.420512  |
|        |       | 0.422       | 0.604229  | 0.462223  |
|        |       | 0.408       | 0.436712  | 0.361112  |
|        |       | 0.428       | 0.451102  | 0.356433  |
|        |       | 0.4         | 0.455666  | 0.387222  |
|        | 0.377 | 0.534229    | 0.342113  | 0.51877   |
| mean   |       | 0.403787498 | 0.4882761 | 0.4015902 |
| SD     |       | 0.018387145 | 0.0554939 | 0.0444709 |
| SE     |       | 0.006949688 | 0.0209747 | 0.0168084 |

| SILICA+O3 | 0 | 24h         | 48h       | 72h       |
|-----------|---|-------------|-----------|-----------|
|           |   | 0.401199996 | 0.4394    | 0.357     |
|           |   | 0.402999997 | 0.5291    | 0.4887    |
|           |   | 0.401800007 | 0.4131    | 0.4273    |
|           |   | 0.366299987 | 0.45689   | 0.40123   |
|           |   | 0.401199996 | 0.3482    | 0.3234    |
|           |   | 0.402999997 | 0.454     | 0.3969    |
|           |   | 0.401800007 | 0.458     | 0.4254    |
|           |   | 0.366299987 | 0.48922   | 0.4105    |
|           |   | 0.397223    | 0.50243   | 0.398223  |
| mean      | c | 0.4544822   | 0.4031837 | 0.468357  |
| SD        |   | 0.015533796 | 0.0528297 | 0.0461086 |
| SE        |   | 0.005492026 | 0.0186781 | 0.0163018 |

| C+   | 0 | 24h         | 48h      | 72h      |
|------|---|-------------|----------|----------|
|      |   | 0.391199996 | 0.2114   | 0.1951   |
|      |   | 0.382999997 | 0.2212   | 0.1864   |
|      |   | 0.411800007 | 0.2058   | 0.1786   |
|      |   | 0.366299987 | 0.2219   | 0.1947   |
|      |   | 0.391199996 | 0.2157   | 0.1752   |
|      |   | 0.392999997 | 0.2113   | 0.1597   |
| mean |   | 0.333785712 | 0.21455  | 0.181617 |
| SD   |   | 0.014803846 | 0.006271 | 0.013465 |
| SE   |   | 0.006043645 | 0.00256  | 0.005497 |

| CTRL   | 0 | 24h    | 48h    | 72h    |
|--------|---|--------|--------|--------|
| CTRL   |   | 0.3891 | 0.5535 | 0.5163 |
| SIL    |   | 0.4038 | 0.4883 | 0.4016 |
| SIL+O3 |   | 0.3931 | 0.4545 | 0.4032 |
| C+     |   | 0.3338 | 0.2146 | 0.1816 |
| SE     |   | 0.0069 | 0.0257 | 0.0246 |
| SE     |   | 0.0069 | 0.0210 | 0.0168 |
| SE     |   | 0.0055 | 0.0187 | 0.0163 |
| SE     |   | 0.0022 | 0.0076 | 0.0067 |

NORMALIZED VALUE

| CTRL  | 0 | 24h    | 48h      | 72h      |
|-------|---|--------|----------|----------|
| CTRL  |   | 100    | 142.2408 | 132.6755 |
| SIL   |   | 100    | 120.9240 | 99.4558  |
| SIL+O |   | 100    | 115.6223 | 102.5717 |
| C+    |   | 100    | 64.2778  | 54.4112  |
| SE    |   | 1.7674 | 4.6470   | 4.7715   |
| SE    |   | 1.7211 | 4.2957   | 4.1855   |
| SE    |   | 1.3972 | 4.1098   | 4.0433   |
| SE    |   | 0.6717 | 2.2845   | 3.6644   |

T-Test

|                     |                 |
|---------------------|-----------------|
| SIL 24 vsCtrl 24    | 0.048186492     |
| SIL 48 vsCtrl 24    | 0.000732954 **  |
| SIL 72 vsCtrl 24    | 0.032475219 *   |
| SIL+O3 24 vsCtrl 24 | 0.00447594 **   |
| SIL+O3 48 vsCtrl    | 0.000907095 **  |
| SIL+O3 72 vsCtrl    | 0.015098933     |
| C+ vs C 24h         | 4.54778E-08 *** |
| C+ vs C 48h         | 3.53362E-08 *** |
| C+ vs C 72h         | 7.53164E-12 *** |

## MTS\_A549

| CTRL | 0           | 24h     | 48h     | 72h     |
|------|-------------|---------|---------|---------|
|      | 0.93809998  | 1.2627  | 1.6001  | 1.437   |
|      | 1.078299999 | 1.3286  | 1.6106  | 1.2636  |
|      | 0.930499971 | 1.376   | 1.323   | 1.0379  |
|      | 0.902499974 | 1.34544 | 1.2134  | 0.9453  |
|      | 0.93387     | 0.978   | 1.3959  | 1.34601 |
|      | 1.03452     | 1.2803  | 1.413   | 1.3456  |
|      | 0.9856      | 1.262   | 0.956   | 1.2457  |
|      | 1           | 0.956   | 1.43498 | 1.3798  |
|      | 0.88777     | 1.26665 | 1.6433  | 0.91211 |
| mean | 0.966651103 | 1.2284  | 1.3989  | 1.2126  |
| SD   | 0.07880126  | 0.1537  | 0.2188  | 0.1968  |
| SE   | 0.03940063  | 0.0887  | 0.0977  | 0.0868  |

| SILICA | 0           | 24h    | 48h     | 72h    |
|--------|-------------|--------|---------|--------|
|        | 0.93809998  | 1.208  | 1.104   | 0.932  |
|        | 1.078299999 | 1.1696 | 1.1544  | 1.039  |
|        | 0.930499971 | 1.183  | 1.00435 | 0.9383 |
|        | 0.802499974 | 1.2878 | 0.959   | 1.016  |
|        | 0.9387      | 1.1803 | 1.013   | 0.973  |
|        | 1.03452     | 1.062  | 1.256   | 0.9134 |
|        | 0.9856      | 0.956  | 0.952   | 1.1461 |
|        | 1           | 0.954  | 0.961   | 1.1456 |
|        | 0.9777      | 1.168  | 1.1746  | 0.8357 |
|        |             | 1.237  |         |        |
| mean   | 0.960279992 | 1.1299 | 1.0643  | 0.9932 |
| SD     | 0.112692675 | 0.0195 | 0.0764  | 0.06   |
| SE     | 0.056346338 | 0.0113 | 0.0441  | 0.0347 |

| SILICA+O3 | 0           | 24h     | 48h     | 72h     |
|-----------|-------------|---------|---------|---------|
|           | 0.93809998  | 1.1955  | 0.9289  | 1.1656  |
|           | 1.078299999 | 1.2949  | 1.3572  | 0.8839  |
|           | 0.930499971 | 1.4485  | 1.0647  | 0.7983  |
|           | 0.992499974 | 1.4287  | 1.1402  | 1.2091  |
|           | 1.19875     | 1.14534 | 0.9948  | 0.98123 |
|           | 0.9743      | 1.19832 | 1.1598  | 0.8948  |
|           | 0.9823      | 0.92387 | 1.2987  | 1.03872 |
|           | 1.2398      | 0.9861  | 1.02398 | 0.89321 |
|           | 1.2987      | 1.3211  | 1.29871 | 0.98765 |
| mean      | 0.963324992 | 1.2158  | 1.1408  | 0.9836  |
| SD        | 0.07880126  | 0.1275  | 0.1791  | 0.2037  |
| SE        | 0.03940063  | 0.0736  | 0.0623  | 0.0332  |

| C+   | 0           | 24h     | 48h     | 72h     |
|------|-------------|---------|---------|---------|
|      | 0.98809998  | 0.8221  | 0.7256  | 0.5606  |
|      | 1.078299999 | 0.8191  | 0.6915  | 0.5588  |
|      | 0.930499971 | 0.8032  | 0.7481  | 0.5374  |
|      | 0.992499974 | 0.78956 | 0.6806  | 0.5656  |
|      | 1.19875     | 0.77636 | 0.6671  | 0.617   |
|      | 0.9743      | 0.7823  | 0.6882  | 0.6547  |
| mean | 0.880349989 | 0.79877 | 0.70018 | 0.58235 |
| SD   | 0.096873864 | 0.01916 | 0.03046 | 0.04419 |
| SE   | 0.039548589 | 0.00782 | 0.01244 | 0.01804 |

| CTRL   | 0      | 24h    | 48h    | 72h    |
|--------|--------|--------|--------|--------|
| CTRL   | 0.9667 | 1.2284 | 1.3989 | 1.2126 |
| SIL    | 0.9603 | 1.1299 | 1.0643 | 0.9932 |
| SIL+O3 | 0.9633 | 1.2158 | 1.1408 | 0.9836 |
| C+     | 0.8803 | 0.7988 | 0.7002 | 0.5823 |
| SE     | 0.0394 | 0.0887 | 0.0977 | 0.0868 |
| SE     | 0.0563 | 0.0113 | 0.0441 | 0.0347 |
| SE     | 0.0394 | 0.0736 | 0.0623 | 0.0332 |
| SE     | 0.0161 | 0.0300 | 0.0254 | 0.0136 |

### NORMALIZED VALUE

|        | 0      | 24h      | 48h      | 72h      |
|--------|--------|----------|----------|----------|
| CTRL   | 100    | 127.0789 | 144.7182 | 125.4390 |
| SIL    | 100    | 117.6590 | 110.8282 | 103.4316 |
| SIL+O3 | 100    | 126.2102 | 118.4207 | 102.1060 |
| C+     | 100    | 90.7332  | 79.5347  | 66.1498  |
| SE     | 4.0760 | 7.2219   | 6.9825   | 7.1565   |
| SE     | 5.8677 | 0.9959   | 4.1425   | 3.4901   |
| SE     | 4.0901 | 6.0528   | 5.4646   | 3.3776   |
| SE     | 1.8271 | 3.7612   | 3.6347   | 2.3290   |

### T-Test

|                  |                |
|------------------|----------------|
| SIL 24 vsCtrl 24 | 0.17123048 **  |
| SIL 48 vsCtrl 24 | 0.0008545 **   |
| SIL 72 vsCtrl 24 | 0.00936275     |
| SIL+O3 24 vsCtrl | 0.87532283 *   |
| SIL+O3 48 vsCtrl | 0.01017177 *   |
| SIL+O3 72 vsCtrl | 0.01103546     |
| C+vs C 24h       | 1.4043E-05 *** |
| C+vs C 48h       | 3.4919E-06 *** |
| C+vs C 72h       | 3.7565E-06 *** |
